# Supplementary material
Source: Springer Nature journal article supplement (https://www.springermedizin.de/resource/supplementary/13014_2010_368_MOESM5_ESM.pdf/9633632)

**A**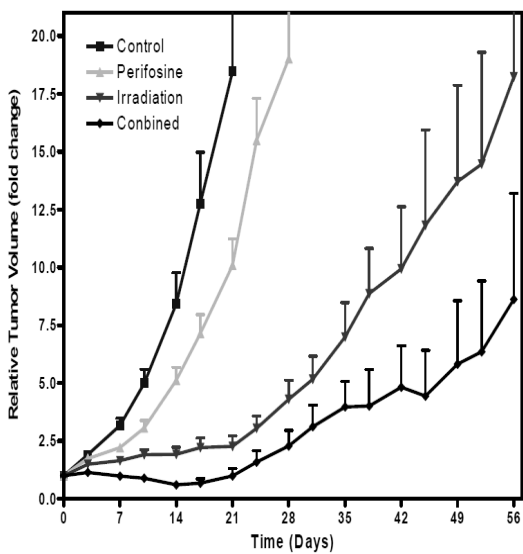**B**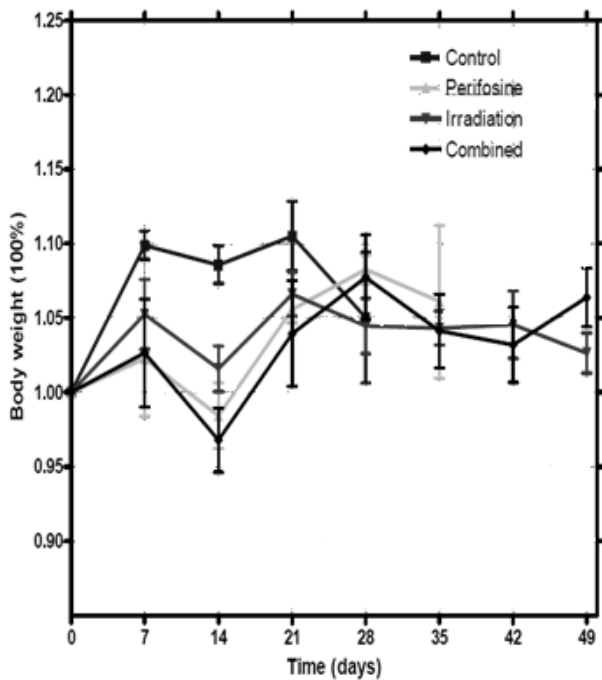

Supplement: MOESM5 [file 9633632]
